# Supplementary material for: Truncated O-Glycan-Bearing MUC16 Enhances Pancreatic Cancer Cells Aggressiveness via α4β1 Integrin Complexes and FAK Signaling
Source: Int J Mol Sci. 2022 May 13;23(10):5459. doi: 10.3390/ijms23105459 (PMC9141077; doi:10.3390/ijms23105459)
Supplement: Supplementary file 1 [file ijms-23-05459-s001.zip › Supplementary Table 1.xlsx]

## Sheet: MUC16 positively correlated gen
Genes	PearsonCC
SCEL	0.65								UALCAN
VGLL1	0.63								After excluding values with a median TPM < 0.5, the mRNA expression of 636 genes is positively altered with alteration in MUC16 mRNA expression.
NOG	0.63
PTGES	0.61
KRT7	0.6
ZNF185	0.59
SPTBN2	0.58
FAM129B	0.57
BCAR3	0.57
C15orf52	0.56
GPR87	0.56
TTC9	0.56
PTPRU	0.56
FLNB	0.56
PPL	0.55
RHOD	0.55
ZNF365	0.55
CRABP2	0.55
RTKN2	0.54
CMTM7	0.54
C8orf73	0.54
ANXA1	0.54
ZBED2	0.54
S100A4	0.53
RASA1	0.53
PLAU	0.53
WNT7A	0.52
PLEC	0.51
CDCP1	0.51
C10orf47	0.51
FAM83A	0.5
MAPKAPK3	0.5
SLC16A3	0.5
LYPD3	0.5
C10orf55	0.5
GNA15	0.5
MECR	0.5
SULT2B1	0.5
TGM2	0.5
TACSTD2	0.49
A4GALT	0.49
AGRN	0.49
SNCG	0.49
COX6B2	0.49
WNT10A	0.49
SLC2A4RG	0.48
KCNMB4	0.48
UNC93B1	0.48
PPP1R13L	0.48
GJB3	0.48
CAPN1	0.48
MBOAT2	0.48
FAM3C	0.47
STRA6	0.47
C10orf116	0.47
LRRC8A	0.47
GRHL1	0.47
RARG	0.47
CST6	0.47
PYGL	0.46
PPP1R14B	0.46
EPHA2	0.46
CDCA4	0.46
DUSP7	0.46
KRT81	0.46
CELSR1	0.46
HSF1	0.46
TMEM132A	0.45
FAM83H	0.45
ITGA3	0.45
DCBLD2	0.45
ARHGAP23	0.45
INPP4B	0.45
LEMD1	0.45
SLC2A1	0.45
LIMK1	0.45
CDA	0.45
CAPS	0.45
ALDH3B1	0.45
PHLDA3	0.45
MICALL1	0.45
RPSAP52	0.45
CYP27C1	0.45
PHLDA1	0.44
FSCN1	0.44
TWF2	0.44
UBTD1	0.44
CNTNAP3	0.44
PMEPA1	0.44
DVL1	0.44
SSH3	0.44
TRIM8	0.44
CTSL2	0.43
KIAA1609	0.43
C11orf80	0.43
TNK2	0.43
GATA3	0.43
B4GALT5	0.43
PVRL4	0.43
S100A11	0.43
ANKRD1	0.43
MFI2	0.43
KRT80	0.43
ANXA8L2	0.43
ANO1	0.43
UNC13D	0.43
SIX4	0.43
TPD52L2	0.43
P2RY2	0.43
ABLIM3	0.43
MALL	0.42
MED15	0.42
PIAS3	0.42
SULF2	0.42
ASAP2	0.42
SPINT1	0.42
TGFA	0.42
LOC100216001	0.42
AXL	0.42
UBE2E3	0.42
MYOF	0.42
RND3	0.42
KLC3	0.42
SEMA3B	0.42
FOXC1	0.42
ANKRD56	0.41
DNAJC9	0.41
LAMB3	0.41
ANGPTL4	0.41
HYAL3	0.41
E2F7	0.41
KRT19	0.41
CLIC3	0.41
TMEM189	0.41
GTF2IRD1	0.41
AHNAK2	0.41
SIK1	0.41
TRIP10	0.41
BCL9L	0.41
SLC7A5	0.41
ADAM8	0.4
CGB8	0.4
NFKBIL2	0.4
LDHA	0.4
MUC4	0.4
PLEKHN1	0.4
SCRIB	0.4
LAMC2	0.4
SPRR1B	0.4
ENDOD1	0.4
WNT5B	0.4
FAM38A	0.4
ANXA11	0.4
C3orf67	0.4
IRAK1	0.4
PCDH1	0.4
ACTN4	0.4
S100A16	0.4
CNN2	0.4
CAST	0.4
KLHL21	0.4
PLA2G16	0.4
ITGB4	0.4
PSMD2	0.4
PTTG1IP	0.4
PYGB	0.4
VASN	0.4
STIM1	0.4
KCNN4	0.4
SEMA4C	0.4
HES2	0.39
MBOAT7	0.39
SHARPIN	0.39
KRT6C	0.39
PSCA	0.39
COMT	0.39
DHX32	0.39
NT5E	0.39
SFXN3	0.39
TBC1D2	0.39
ADAM19	0.39
NET1	0.39
NMU	0.39
EVPL	0.39
SLC44A2	0.39
REXO2	0.39
WNT7B	0.39
KRT6B	0.39
PLXNB3	0.39
C20orf111	0.39
UBA6	0.39
SLC16A5	0.39
ARNTL2	0.39
C15orf48	0.39
ST3GAL4	0.39
ANXA8	0.38
TMOD3	0.38
HERC4	0.38
PADI1	0.38
IGF2BP2	0.38
ZFYVE19	0.38
SEC14L2	0.38
PAK4	0.38
KLK6	0.38
GPX1	0.38
NCRNA00152	0.38
BEAN	0.38
PKM2	0.38
AGTRAP	0.38
POC1A	0.38
EFNA5	0.38
PLCD1	0.38
PLEKHA7	0.38
ADK	0.38
PFKP	0.38
USP43	0.38
TMEM41A	0.38
LY6D	0.38
PDLIM7	0.38
CLSTN1	0.38
FRMD5	0.38
TFAP2A	0.38
ALDH1A3	0.38
EPS8L2	0.38
CPNE1	0.38
SPC24	0.38
GMPS	0.38
PLXNA1	0.37
CDK16	0.37
HRH1	0.37
SPIN4	0.37
HK1	0.37
DNTTIP1	0.37
RHBDF2	0.37
GPR153	0.37
PGAM1	0.37
CEACAM1	0.37
PACSIN3	0.37
AIG1	0.37
RYK	0.37
KRT6A	0.37
MFSD2B	0.37
F3	0.37
GYS1	0.37
ANXA2P2	0.37
AMIGO2	0.37
CHMP4B	0.37
PAQR7	0.37
BCAP31	0.37
PERP	0.37
DTX4	0.37
C9orf169	0.37
COL22A1	0.37
CTSD	0.37
GJB2	0.37
LY6E	0.37
GIPC1	0.37
PLEKHG5	0.37
TGFB2	0.37
DALRD3	0.37
TRIM29	0.37
SEMA3A	0.37
ALS2CL	0.37
PTK6	0.37
DMKN	0.36
DRAP1	0.36
SART1	0.36
WFDC2	0.36
IL1RN	0.36
CYB5R2	0.36
FAM110A	0.36
LPCAT2	0.36
GLUD1	0.36
P2RY6	0.36
LRRN1	0.36
ANXA3	0.36
SUMF1	0.36
IL18	0.36
SMS	0.36
PODXL	0.36
RPS6KA4	0.36
FAM89B	0.36
ZNF341	0.36
TMEM79	0.36
TSPAN14	0.36
ARL4D	0.36
MPZL2	0.36
CCNG2	0.36
GCSH	0.36
ANXA2	0.36
ANKRD13D	0.36
COL17A1	0.36
CTNNBIP1	0.36
NRP2	0.36
AP2M1	0.36
DERA	0.36
KRT17	0.36
FCRLB	0.36
LOC728643	0.36
NOD2	0.36
AVPI1	0.36
EIF4G1	0.36
LETM2	0.36
PRSS22	0.35
CAPNS1	0.35
CACNB3	0.35
RAET1G	0.35
SUSD2	0.35
USP4	0.35
REEP3	0.35
HMGA1	0.35
SNX21	0.35
PLSCR3	0.35
CMTM3	0.35
CD151	0.35
PPP4R1	0.35
SMURF2	0.35
CSTB	0.35
LTBP3	0.35
ANLN	0.35
ENO1	0.35
C15orf62	0.35
SH3GLB2	0.35
MFSD10	0.35
RAI1	0.35
HAUS5	0.35
FERMT1	0.35
MMS19	0.35
OSBPL10	0.35
PLAUR	0.35
BCL2L1	0.35
ELFN2	0.35
SH3BP2	0.35
JUP	0.35
L1CAM	0.35
LRRC42	0.35
FAM86D	0.35
LRRC8E	0.35
MDFI	0.35
CDH3	0.35
TRPV4	0.35
EMP3	0.35
C20orf20	0.35
LAMA5	0.35
NT5C2	0.35
EXOSC7	0.34
TSKU	0.34
LZTS2	0.34
PAX8	0.34
NGEF	0.34
PORCN	0.34
BCAT1	0.34
ATL2	0.34
CATSPER1	0.34
GRIP1	0.34
C20orf199	0.34
ANKRD27	0.34
FGD6	0.34
PUF60	0.34
CEP55	0.34
MTL5	0.34
ARTN	0.34
INF2	0.34
HMGA2	0.34
TMSB10	0.34
DUSP10	0.34
PTPN23	0.34
AFAP1	0.34
ARHGEF4	0.34
SLC39A10	0.34
IGFBP3	0.34
EIF6	0.34
PABPC1	0.34
PXN	0.34
ZFPL1	0.34
DIAPH3	0.34
SF3B14	0.34
C14orf153	0.34
PVRL1	0.34
CLDN4	0.34
RNF149	0.34
MET	0.34
PACS1	0.34
FXYD5	0.34
NUDT19	0.34
C9orf89	0.34
UHRF1	0.34
SHKBP1	0.34
VWA2	0.34
CALB2	0.34
TMC6	0.34
ARL8B	0.34
PLOD1	0.34
PROM2	0.34
HES4	0.34
CHST6	0.33
OBFC1	0.33
CAV2	0.33
NCCRP1	0.33
ATG9B	0.33
GLRX3	0.33
HDGF	0.33
SCCPDH	0.33
TINAGL1	0.33
MARK2	0.33
CLIP4	0.33
ACTG1	0.33
BHLHE41	0.33
SSSCA1	0.33
ETV6	0.33
RAB1B	0.33
GAS2L1	0.33
KRT16	0.33
KIAA1522	0.33
TMEM169	0.33
CAMK2N1	0.33
TFAP2C	0.33
PIP5KL1	0.33
SSRP1	0.33
DUSP14	0.33
SYT8	0.33
INADL	0.33
APEH	0.33
YEATS2	0.33
TUBB3	0.33
DOCK9	0.33
METRNL	0.33
GRAMD3	0.33
SLK	0.33
UBN1	0.33
TMEM43	0.33
LOC541471	0.33
TMCC1	0.33
CUEDC1	0.33
MYL12A	0.33
PLIN3	0.33
KCTD11	0.33
CDC42BPG	0.33
SLPI	0.33
IL1RAP	0.33
IRAK2	0.33
CDK7	0.33
MAP3K9	0.33
FAM65A	0.33
PDXK	0.33
RBMS2	0.33
GPRC5A	0.33
G0S2	0.33
CAV1	0.33
RELA	0.33
PGK1	0.33
STYXL1	0.32
ZDHHC3	0.32
C8orf31	0.32
MTHFD1L	0.32
PKP3	0.32
ZNF581	0.32
EPS8L1	0.32
RAP2B	0.32
TSPAN6	0.32
NOTCH3	0.32
MKNK2	0.32
CKS1B	0.32
CMTM6	0.32
FTSJ1	0.32
LAMA3	0.32
AP1S3	0.32
MCM4	0.32
DLG5	0.32
OVOL1	0.32
ARHGEF19	0.32
BID	0.32
PTPN12	0.32
TUBGCP2	0.32
DBN1	0.32
STK3	0.32
C19orf51	0.32
ADRM1	0.32
STAC	0.32
MAL2	0.32
PLXNA3	0.32
TTC7A	0.32
ATG7	0.32
FGFBP1	0.32
UBAC2	0.32
VSTM2L	0.32
KLHDC7B	0.32
SDC4	0.32
CCNB1	0.32
LMO7	0.32
CAPN2	0.32
GJB4	0.32
RALY	0.32
CCT2	0.32
INSIG2	0.32
ACOT4	0.32
FOSL1	0.32
RHOC	0.32
ARHGAP32	0.32
KCMF1	0.32
PUSL1	0.32
GAN	0.32
AFAP1L2	0.32
C19orf33	0.32
GPR39	0.32
KLK7	0.31
ZC3H3	0.31
CSE1L	0.31
CKLF	0.31
FZD6	0.31
KRT18	0.31
ARPC4	0.31
CNIH4	0.31
FAM71D	0.31
SOX13	0.31
C10orf46	0.31
IKZF2	0.31
C16orf46	0.31
DSCR6	0.31
DUSP5	0.31
MRPL15	0.31
TNFRSF21	0.31
CDKN2D	0.31
KLK10	0.31
CSDA	0.31
ZDHHC16	0.31
TES	0.31
SLC6A14	0.31
TMEM184B	0.31
SH2D3A	0.31
DKK1	0.31
HJURP	0.31
CSNK1E	0.31
LOC84989	0.31
PLP2	0.31
RCC2	0.31
OTX1	0.31
HSF2BP	0.31
2022-09-09	0.31
IER5L	0.31
GPR172A	0.31
ATG16L1	0.31
ASCC1	0.31
PLS3	0.31
TNKS1BP1	0.31
SLC4A11	0.31
CHST11	0.31
C4orf10	0.31
PPDPF	0.31
PPM1G	0.31
ADSS	0.31
TRIM65	0.31
TMCO4	0.31
TATDN1	0.31
TPX2	0.31
PRSS27	0.31
ZNF707	0.31
ALDH3B2	0.31
RCE1	0.31
RARRES3	0.3
BANF1	0.3
FAM84B	0.3
MAP7D1	0.3
FBXO27	0.3
SMYD5	0.3
PRIC285	0.3
PTMA	0.3
PPP1R14C	0.3
FOXD1	0.3
STRN4	0.3
RHOV	0.3
ITGB8	0.3
C15orf23	0.3
EPHB2	0.3
FAM50A	0.3
IL17RE	0.3
FAF1	0.3
KARS	0.3
MYD88	0.3
FADD	0.3
APLP2	0.3
NAPRT1	0.3
FANK1	0.3
RHBDF1	0.3
RPP30	0.3
BCR	0.3
C20orf11	0.3
SOX4	0.3
TRMT112	0.3
ZNF259	0.3
ULBP2	0.3
ZDHHC5	0.3
NSMCE2	0.3
GALNT2	0.3
PPP1CA	0.3
GPC4	0.3
ATP8B3	0.3
DDX47	0.3
RFC2	0.3
CIDECP	0.3
TMEM134	0.3
BGLAP	0.3
C1orf170	0.3
ZNF251	0.3
VPS28	0.3
PHYHD1	0.3
OSBPL3	0.3
SRPX2	0.3
MACC1	0.3
TMEM87A	0.3
HOMER3	0.3
NME6	0.3
ZFYVE21	0.3
RAD51	0.3
UPK3B	0.3
C22orf23	0.3
RALB	0.3
CD109	0.3
PSMB7	0.3
CRIP2	0.3
TMEM85	0.3
ESRP1	0.3
CTTN	0.3
PRICKLE3	0.3
VARS2	0.3
ISY1	0.3
PPME1	0.3
ST14	0.3
SLC35E3	0.3
GPC1	0.3
CENPF	0.3
NPC2	0.3
CCL13	0.3
NAP1L4	0.3
MMP28	0.3
RALA	0.3

## Sheet: MUC16 negatively correlated gen
Genes	PearsonCC
PECI	-0.32
C6orf192	-0.31
RTN4IP1	-0.31
